# Supplementary material
Source: PubMed Central journal article supplement (PMC4517572)
Supplement: NIHMS696852-supplement-Appendix-1.pdf [file NIHMS696852-supplement-Appendix-1.pdf]

**Title:** U.S. State-Level Income Inequality and Risks of Heart Attack and Coronary Risk Behaviours: Longitudinal Findings.

**Journal:** International Journal of Public Health

**Authors:** Roman Pabayo, PhD; Ichiro Kawachi, MD, PhD; Stephen E. Gilman, ScD

**Corresponding Author:**

Roman Pabayo  
Department of Community Health Sciences  
Lombardi Building, 203, MS 0274  
University of Nevada, Reno  
1664 North Virginia Street  
Reno, NV, USA, 89557

**Tel:** 775-682-7048

**Fax:** 775-784-1340

**Email:** rpabayo@unr.edu

## Appendix-1

### Overall predicted probability and plausible value range

Overall predicted probability:  $1 / 1 + e^{-\gamma^{00}}$

Where  
 $e$  = exponential  
 $\gamma^{00}$  = Coefficient of the intercept

Plausible value range: Lower bound:  $1 / 1 + e^{-[\gamma^{00} - 1.96\sqrt{\tau^{00}}]}$   
Upper bound:  $1 / 1 + e^{-[\gamma^{00} + 1.96\sqrt{\tau^{00}}]}$

Where  
 $e$  = exponential  
 $\gamma^{00}$  = Coefficient of the intercept  
 $\tau^{00}$  = residual area-level variation
